# Supplementary material for: Efficient polymer tandem modules and solar cells by doctor blading
Source: Royal Society of Chemistry journal article supplement (doi:10.1039/c5ta10257j), 2016-01-01
Supplement: c5ta10257j1.pdf [file c5ta10257j1.pdf]

## Supplemental Material

### Efficient Polymer Tandem Modules and Solar Cells by Doctor Blading

Jonas Hanisch\*, Tina Wahl, Cordula D. Wessendorf, Erik Ahlswede

Zentrum für Sonnenenergie- und Wasserstoff-Forschung Baden-Württemberg, ZSW, 70565 Stuttgart, Germany

\*Corresponding author. Tel.: +49 (0) 711 7870 234

Email address: jonas.hanisch@zsw-bw.de

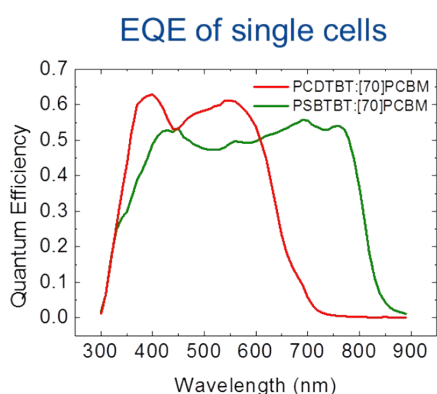

FIG. S1: EQE of single cells with PCDTBT and Si-PCPDTBT blended with PCBM[70].

TABLE 1: Solar cell parameters of the reference subcells optimized for tandem cells and the corresponding tandem cell

| cell                                      | $V_{oc}$<br>(mV) | $j_{sc}$<br>(mA/cm <sup>2</sup> ) | FF<br>(%) | PCE<br>(%) |
|-------------------------------------------|------------------|-----------------------------------|-----------|------------|
| Si-PCPDTBT:[70]PCBM<br>(single ref. cell) | 604              | 13.5                              | 62.2      | 5.1        |
| PCDTBT:[70]PCBM<br>(single ref. cell)     | 883              | 9.2                               | 55.9      | 4.5        |
| Tandem<br>PCDTBT/ Si-PCPDTBT              | 1486             | 8.3                               | 52.6      | 6.5        |
